# Supplementary material for: Quantitative mechanistic model for ultrasmall nanoparticle–protein interactions
Source: Royal Society of Chemistry journal article supplement (doi:10.1039/d0nr04846a), 2020-01-01
Supplement: d0nr04846a1.pdf [file d0nr04846a1.pdf]

## **Supplementary Information**

### **Quantitative Mechanistic Model for Ultrasmall Nanoparticle–Protein Interactions**

**Rodrigo S. Ferreira, André L. Lira, Alioscka A. Sousa\***

**Department of Biochemistry, Federal University of São Paulo, São Paulo, SP 04044-020, Brazil**

\* Corresponding author: [alioscka.sousa@unifesp.br](mailto:alioscka.sousa@unifesp.br)

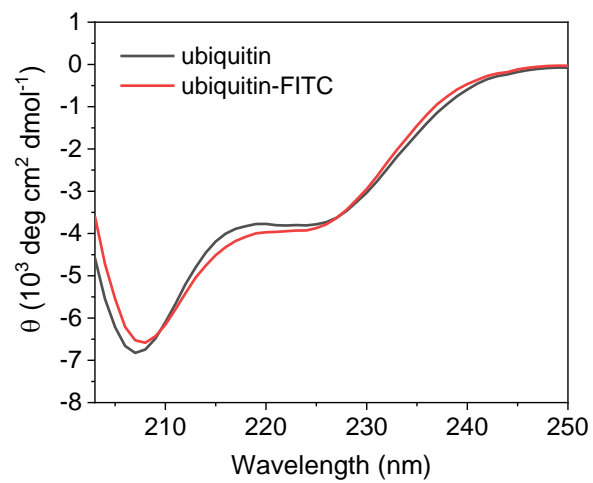

**Figure S1.** Comparison between the CD spectra of unlabeled ubiquitin and FITC-labeled ubiquitin. Data obtained in phosphate-citrate buffer solution containing 5 mM NaCl.

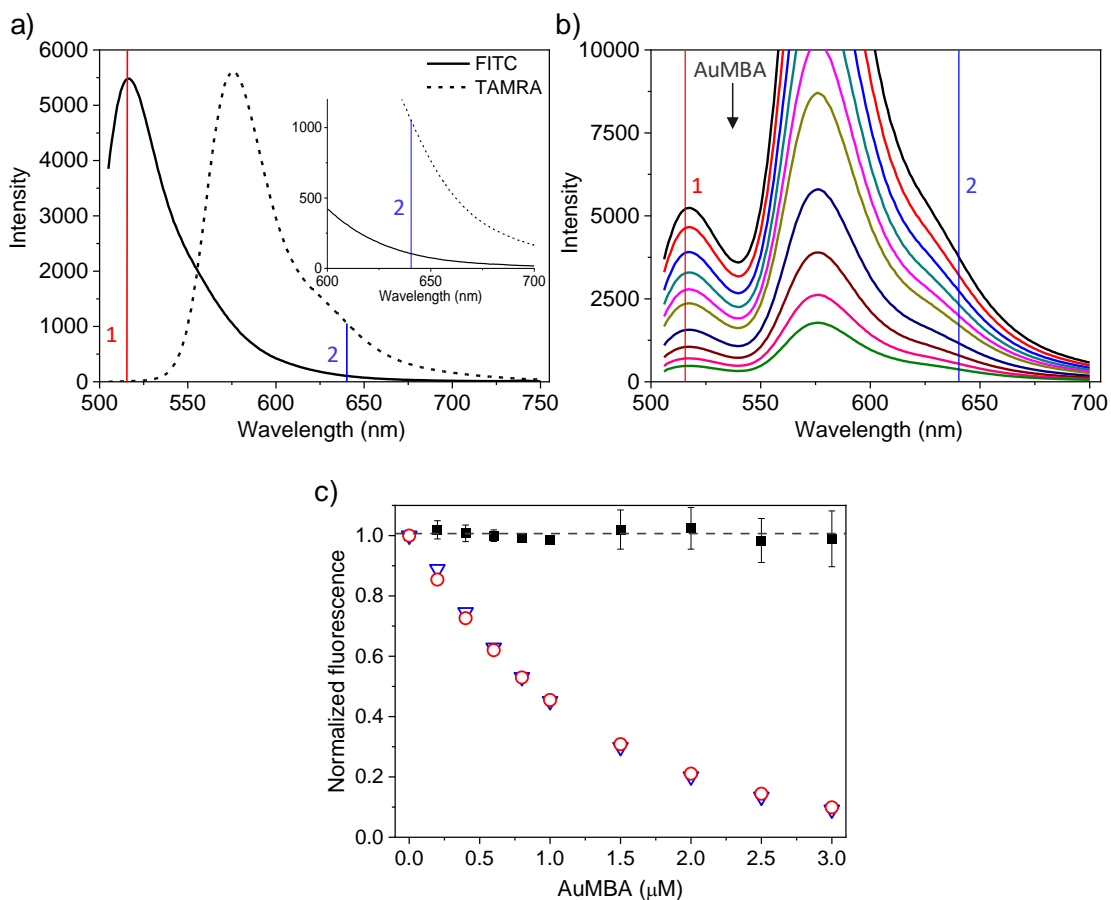

**Figure S2.** Correction of inner-filter effect. (a) Emission spectra of FITC and TAMRA obtained with excitation wavelength of 495 nm. Line 1 shows that TAMRA does not contribute any measurable signal at the wavelength of 515 nm. Line 2 at 640 nm shows that the long tail of the FITC signal extends somewhat within the TAMRA emission region. In (a), the FITC emission signal at 640 nm was 9% of the TAMRA signal at the same wavelength. (b) Titration of a mixture of FITC + TAMRA with AuMBA. The excitation wavelength was 495 nm. (c) Emission intensities recorded at 515 nm (red circles) and 640 nm (blue triangles) obtained from (b) plotted as a function of NP concentration. A corrected FITC titration curve ( $F_{corr}^{515}$ ; black squares) was obtained by application of the equation:  $F_{corr,j}^{515} = (F_j^{515}/F_0^{515})/(F_j^{640}/F_0^{640})$ , where  $F_j$  refers to the uncorrected fluorescence signals for titration  $j$  and  $F_0$  are the initial fluorescence signals. The average of three independent measurements yielded a horizontal line near 1, therefore confirming the accuracy of the inner-filter correction procedure under our experimental conditions.

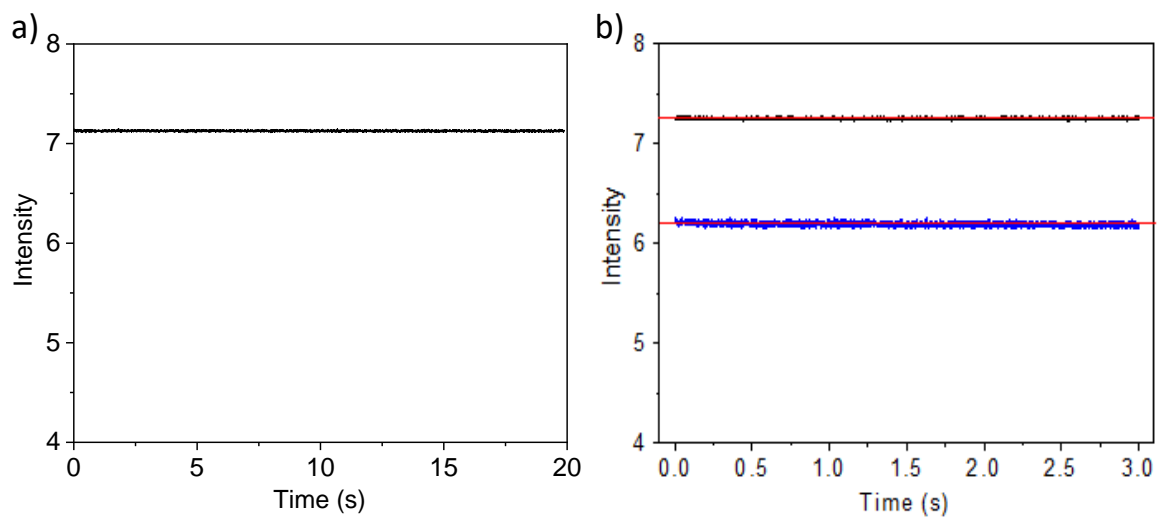

**Figure S3.** (a) Stopped-flow time trace of FITC mixed with buffer showing a high signal stability and lack of fluorescence bleaching up to 20 s. (b) Stopped-flow time traces of FITC (black) and FITC-labeled ubiquitin (blue) following rapid mixing with AuMBA and AuMBA pre-incubated with excess unlabeled ubiquitin, respectively. Red horizontal lines are a guide to the eye. FITC and FITC-ubiquitin, 30 nM; AuMBA, 1  $\mu$ M; unlabeled ubiquitin, 40  $\mu$ M.

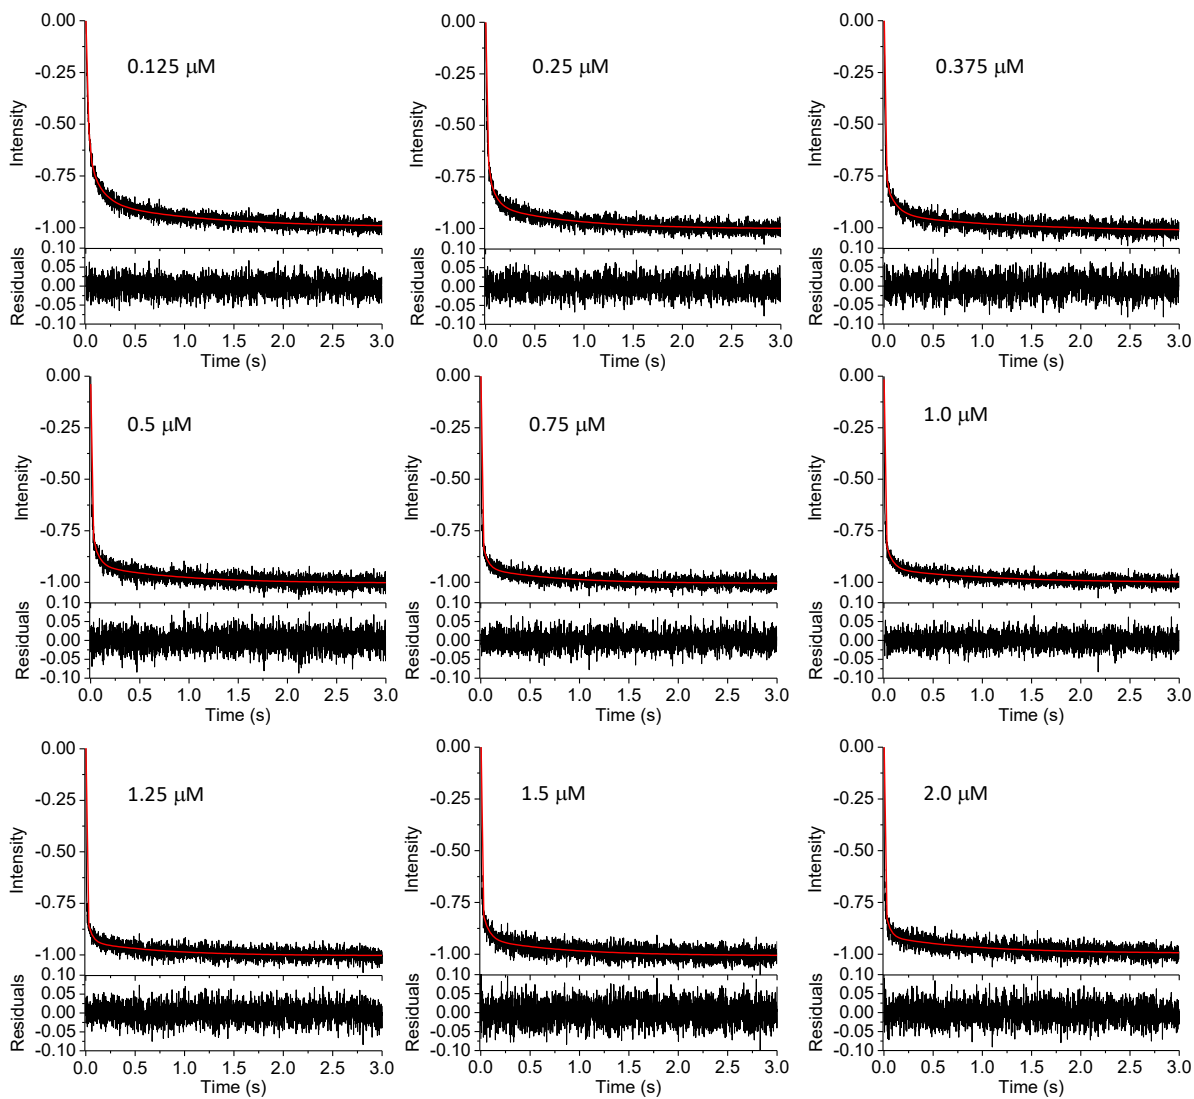

**Figure S4.** Characterization of AuMBA-ubiquitin association reactions. Illustration of stopped-flow time courses fitted to a triple exponential function in the range from 2 to 3000 ms. Fitted lines are shown in red. The different AuMBA concentrations are annotated in each plot. Data recorded in phosphate-citrate buffer solution containing 5 mM NaCl; FITC-ubiquitin, 30 nM.

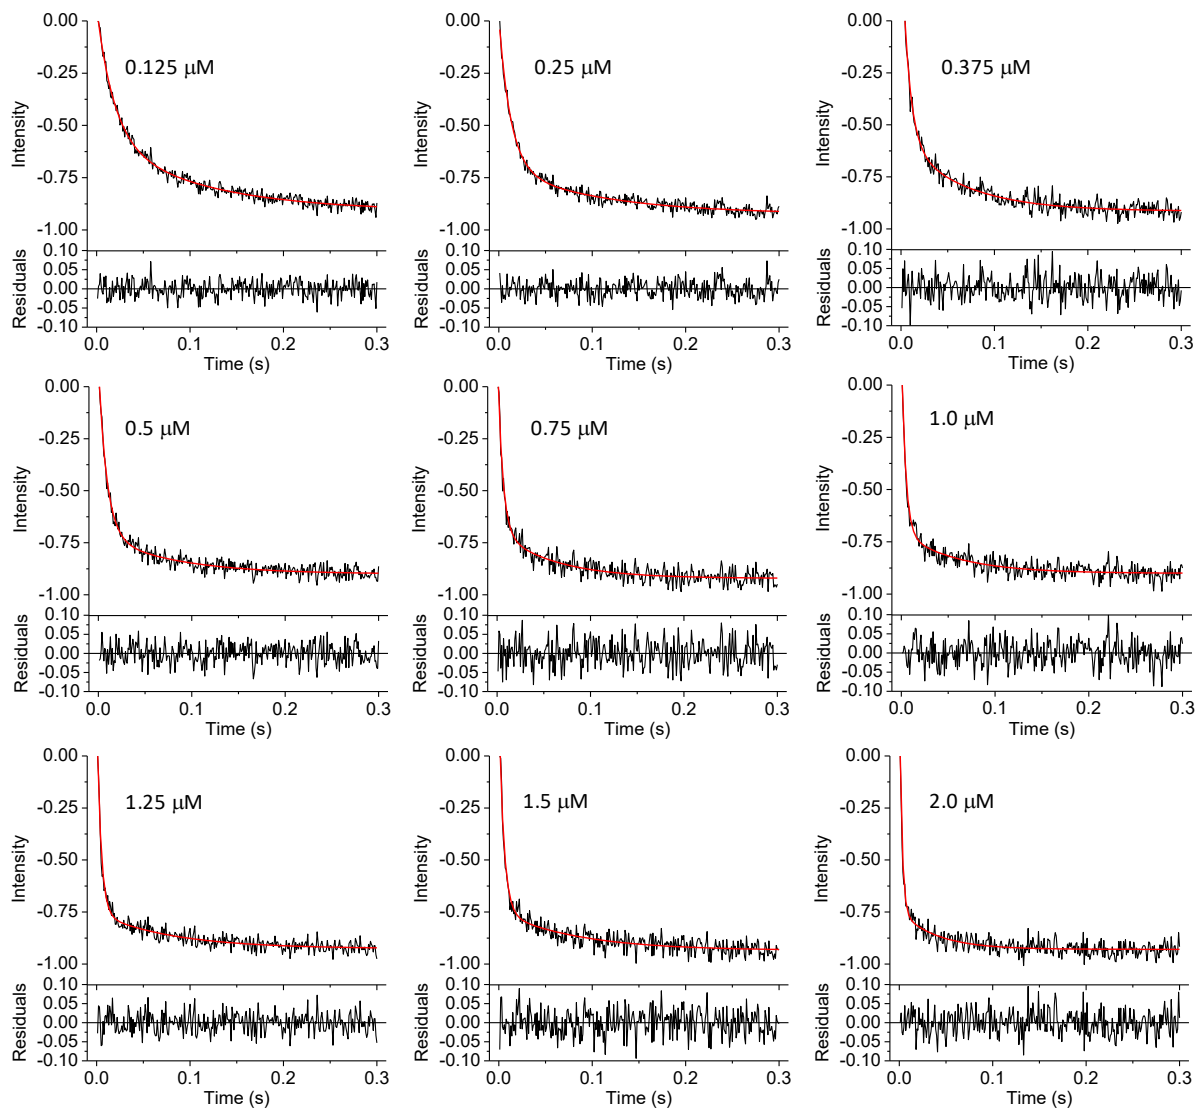

**Figure S5.** Characterization of AuMBA-ubiquitin association reactions. Same as in Fig. S4 but showing the fitting up to 300 ms only.

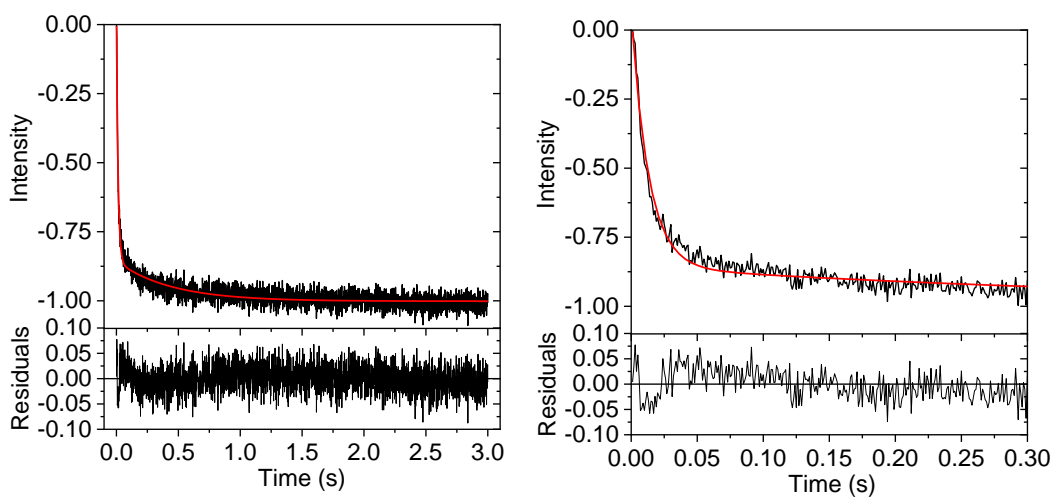

**Figure S6.** Example of bad quality fitting of stopped-flow time traces obtained with a double exponential function. Fitted line is shown in red. Data illustrated for  $[\text{AuMBA}] = 0.75 \mu\text{M}$ .

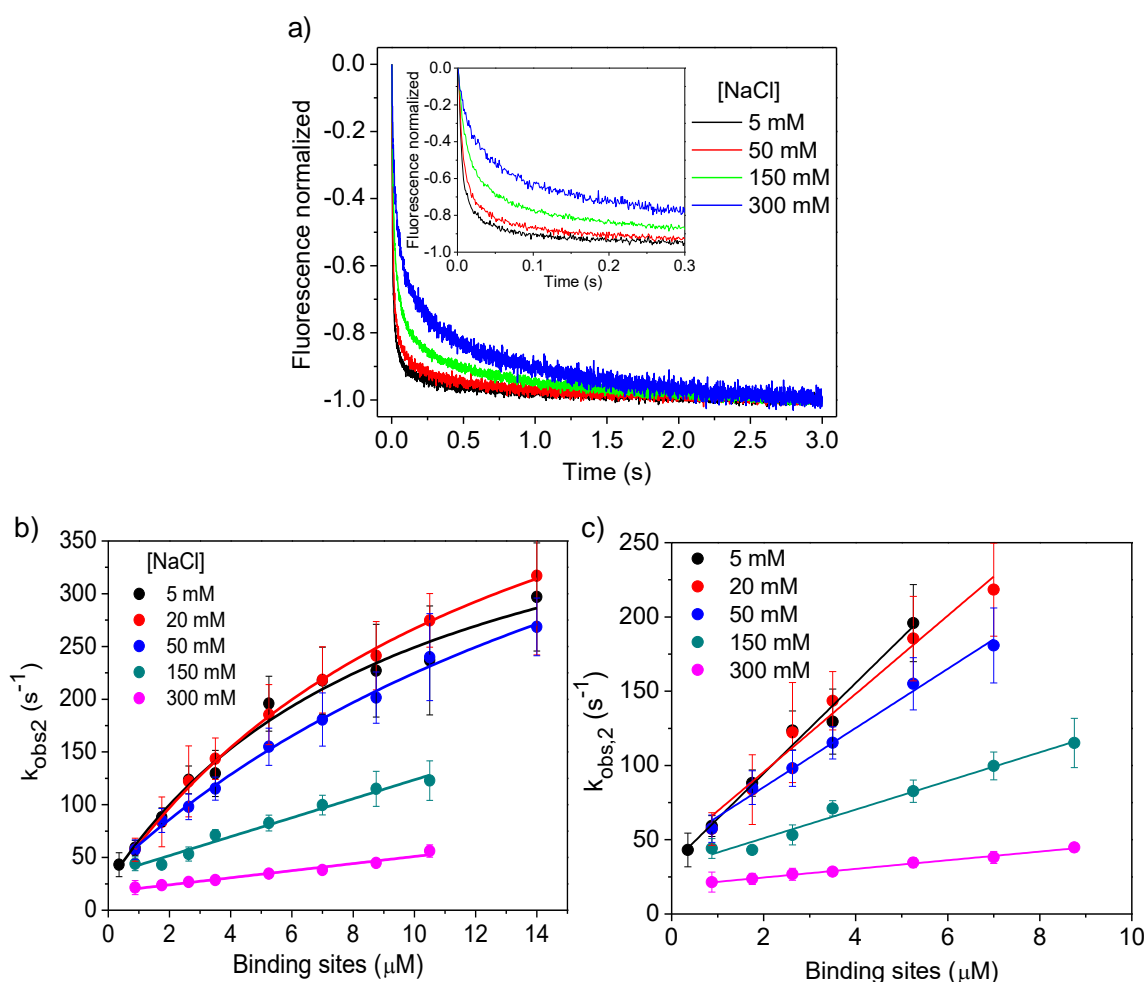

**Figure S7.** Characterization of AuMBA-ubiquitin association reactions under different NaCl concentrations. (a) Normalized time traces of fluorescence quenching following rapid mixing of FITC-labeled ubiquitin with AuMBA. Experiments performed in phosphate-citrate buffer solution containing from 5 to 300 mM NaCl. Data illustrated for  $[AuMBA] = 0.75 \mu M$ . (b) Dependence of  $k_{obs,2}$  vs.  $[NP]$  on the NaCl concentration. (c) Same as (b), but showing only the linear portions of the  $k_{obs,2}$  plots, in which case  $[NP] \ll K_{D1}$ . From Eq. 5 in the main text, it follows that  $k_{obs,2} = (k_2/K_{D1})[NP] + k_{-2}$  when  $[NP] \ll K_{D1}$ . This approximation allows estimating  $K_{D1}$  for  $[NaCl] = 150$  and  $300$  mM from the corresponding slopes ( $k_2/K_{D1}$ ) of the linear plots and assuming a fixed  $k_2$  of  $\sim 600$  s<sup>-1</sup> (the  $k_2$  obtained at 50 mM; Table 2). The calculations yielded  $K_{D1} \sim 60 \mu M$  and  $K_{D1} \sim 200 \mu M$  at the NaCl concentrations of 150 and 300 mM NaCl, respectively (Table 2).



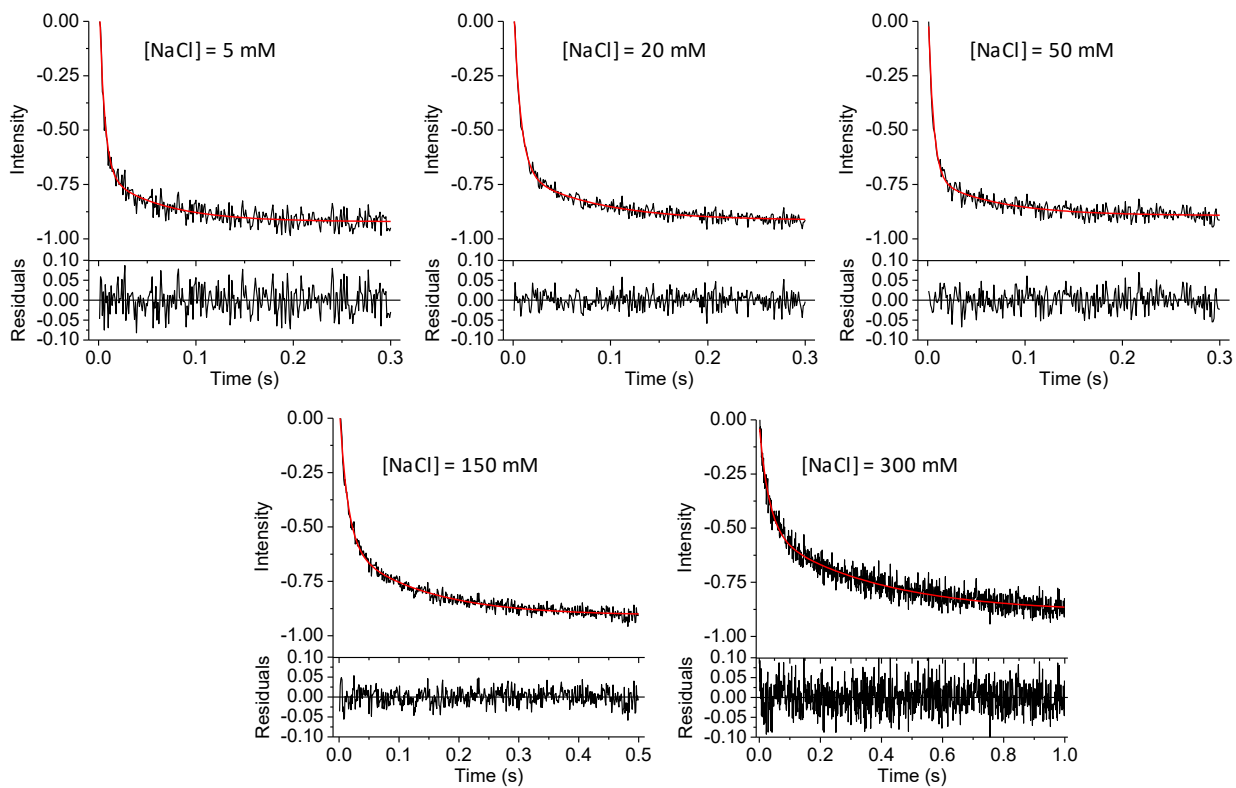

**Figure S8.** Fitting of stopped-flow time courses recorded under different NaCl concentrations. Fitted lines are shown in red. Data sets illustrated for  $[\text{AuMBA}] = 0.75 \mu\text{M}$ .
